# Supplementary material for: Antarctic bacterial natural products: from genomic insights to drug discovery
Source: Royal Society of Chemistry journal article supplement (doi:10.1039/d4np00045e), 2025-01-01
Supplement: d4np00045e1.xlsx [file d4np00045e1.xlsx]

## Sheet: AntarcticBacteriaNPs
Producer	Compound	Reference	Doi
Pseudomonas aeruginosa	several diketopiperazines	Jayatilake et al., 1996	10.1021/np960095b
Antarctic cyanobacterial mats	nodularin	Hitzfeld et al., 2000	10.1016/S0041-0101(00)00103-3
	microcystin-LR
Streptomyces griseus NTK14	gephyromycin	Bringmann et al., 2005	10.1016/j.phytochem.2005.04.010
Streptomyces griseus NTK 97	frigocyclinone	Bruntner et al., 2005	10.1038/ja.2005.43
Pseudoalteromonas haloplanktis TAC125	cyclo-(D-pipecolinyl-L-isoleucine)	Mitova et al., 2005	10.1007/s10126-004-5098-2
	linear peptides
Microbispora aerata IMBAS-11A	bacillamide	Ivanova et al., 2007	10.1080/10826060701199122
	microbiaeratin
Nostoc sp. CCC 537	4-[(5-carboxy-2-hydroxy)-benzyl]-1,10-dihydroxy-3,4,7,11,11-pentamethyloctahydrocyclopenta naphthalene	Asthana et al., 2008	10.1007/s10811-008-9328-2
Janthinobacterium sp. Ant5-2 (J-PVP)	violacein	Mojib et al., 2010	10.1007/s10482-010-9470-0
Flavobacterium sp. Ant342 (F-YOP)	flexirubin
Nocardiopsis sp. SCSIO KS107	4-hydroxymucidone, 7-hydroxymucidone	Shin et al., 2010	10.1016/j.phytol.2010.07.005
	germicidin H
Antarctic cyanobacteria	cylindrospermopsin	Kleinteich et al., 2014	10.1017/S0954102014000145
Pseudomonas sp. BNT1	rhamnolipids	Tedesco et al., 2016	10.3390/md14050083.
Aequorivita sp.	linear aminolipids	Chianese et al., 2018	10.3390/md16060187
Streptomyces sp. SCO736	antartin	Kim et al., 2018	10.3390/md16040130
Bacillus sp. N11-8	polypeptide PBN11-8	Zheng et al., 2018	10.3390/polym10091043
Streptomyces radiopugnans MTCC 5447	C71H83N19O18S5	Mishra & Mahajan, 2019	patent ID: US10501492B2
Streptomyces fildesensis So13.3	actinomycin D	Núñez-Montero et al., 2020	10.3390/biom10050673
Bacillus subtilis So1b	bacillibactin	Núñez-Montero et al., 2020	10.3390/biom10050673
Candidatus Synoicihabitans palmerolidicus	palmerolide	Murray et al., 2021	10.1128/mSphere.00759-21
Pseudomonas sp. ANT_H4	pyomelanin	Styczynsky et al., 2022	10.1186/s12934-022-01990-3
Pseudomonas sp. A6-5	cyclo(L-Pro-D-Tyr)	Liu et al., 2022	10.1007/s10600-022-03684-z
	lumichrome
	4-hydroxyphenylacetic acid
	indole-3-carboxylic acid
	3-indolcarbaldehyde
	indole-2,3-dione
	p-hydroxybenzaldehyde
	N-(phenylmethyl)carbamic acid
Streptomyces albidoflavus ANT_B131	surugamides A, D	da Franca et al., 2023	10.1007/s00203-023-03691-w
	desferrioxamines B, E
	ectoine
Pseudomonas sp. ANT_H12B	pyoverdine	Musialowski et al., 2023	10.1186/s12934-023-02105-2
Nocardiopsis sp. LX-1	nocarpyrroline A	Shi et al., 2023	10.3390/md21020127
Lacinutrix shetlandiensis sp. WUR7	8,9-dihydrocoscinamide B	Vitale et al., 2023	10.1093/pnasnexus/pgad221
Serratia myotis L7-1	serranticin	Xiao et al., 2023	10.3389/fmicb.2022.1085063
Streptomyces sp. DSS69	weddelamycin	Chen et al., 2024	10.3390/md22040189
Pseudonocardia antarctica SCSIO 07407	antarmycin A	Zhou et al., 2024	10.1021/jacsau.4c00912
